# Supplementary material for: What you see is not what you get: implications of the brevity of antibody responses to malaria antigens and transmission heterogeneity in longitudinal studies of malaria immunity
Source: Springer Nature journal article supplement (doi:10.1186/1475-2875-8-242), 2009-10-28
Supplement: 12936_2009_990_MOESM2_ESM.pdf [file 12936_2009_990_MOESM2_ESM.pdf]

OD

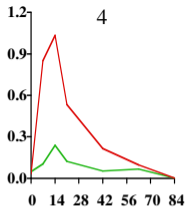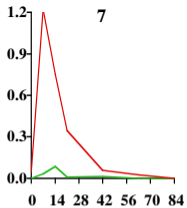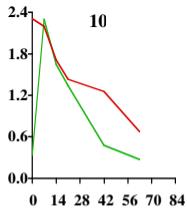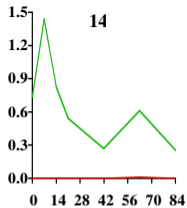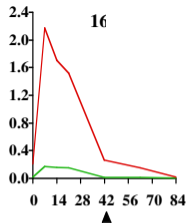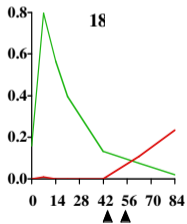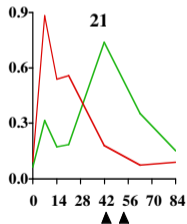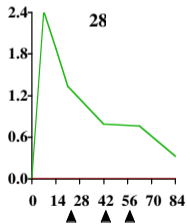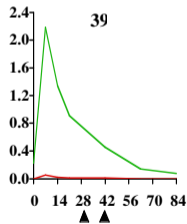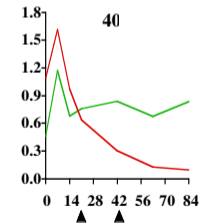

Days after episode
